# Supplementary material for: Direct electron transfer to a metagenome-derived laccase fused to affinity tags near the electroactive copper site
Source: Royal Society of Chemistry journal article supplement (doi:10.1039/c3cp53096e), 2013-01-01
Supplement: c3cp53096e.pdf [file c3cp53096e.pdf]

## Supporting information

### Direct electron transfer of a metagenome-derived laccase fused to affinity tags near the electroactive copper site

Seiya Tsujimura<sup>1\*</sup>, Masafumi Asahi<sup>2</sup>, Maiko Goda-Tsutsumi<sup>2</sup>, Osamu Shirai<sup>2</sup>, Kenji Kano<sup>2\*</sup>, Kentaro Miyazaki<sup>3,4</sup>

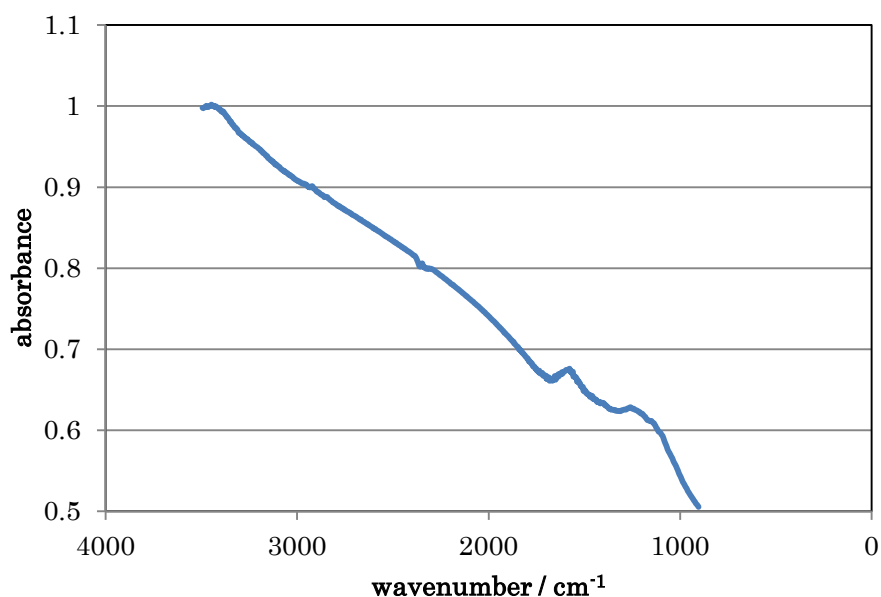

#### Supplementary Figure S1

FT-IR spectrum of carbon aerogel.

The surface characterization was carried out by Fourier-transform infrared (FTIR) (Perkin-Elmer) analysis of carbon aerogel samples. The carbon sample was mixed with KBr thoroughly with an agate mortar and pestle, and the mixture was pressed in a disk in 3 mm diameter.

The peak signal observed at ca. 1700 cm<sup>-1</sup> corresponding to C=O stretching indicates the presence of the carboxyl group on the carbon surface.
